# Supplementary material
Source: PubMed Central journal article supplement (PMC5741462)

**Figure S1.**

Histograms of unadjusted IL-6 (A), log transformed IL-6 (B), unadjusted sTNF-R2 (C), and log transformed sTNF-R2 (D).

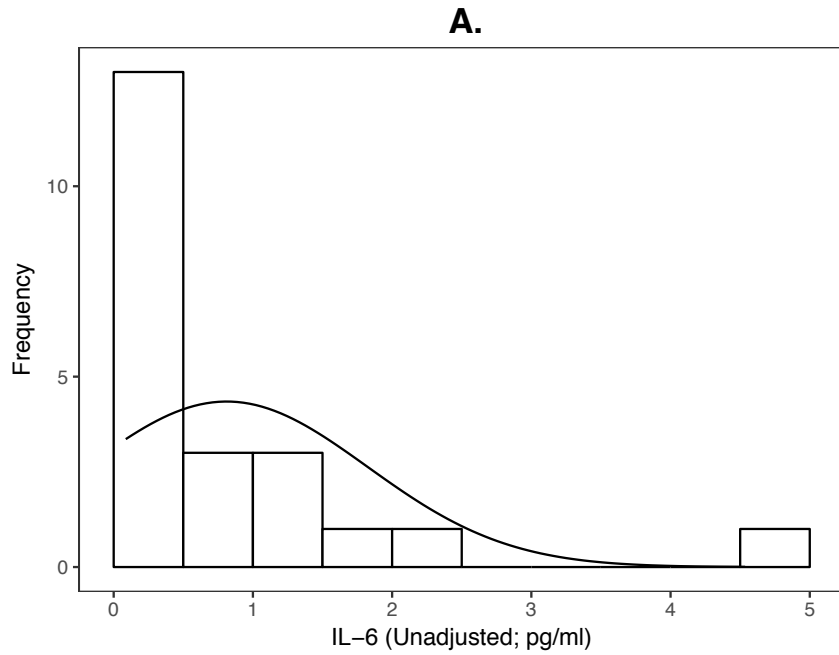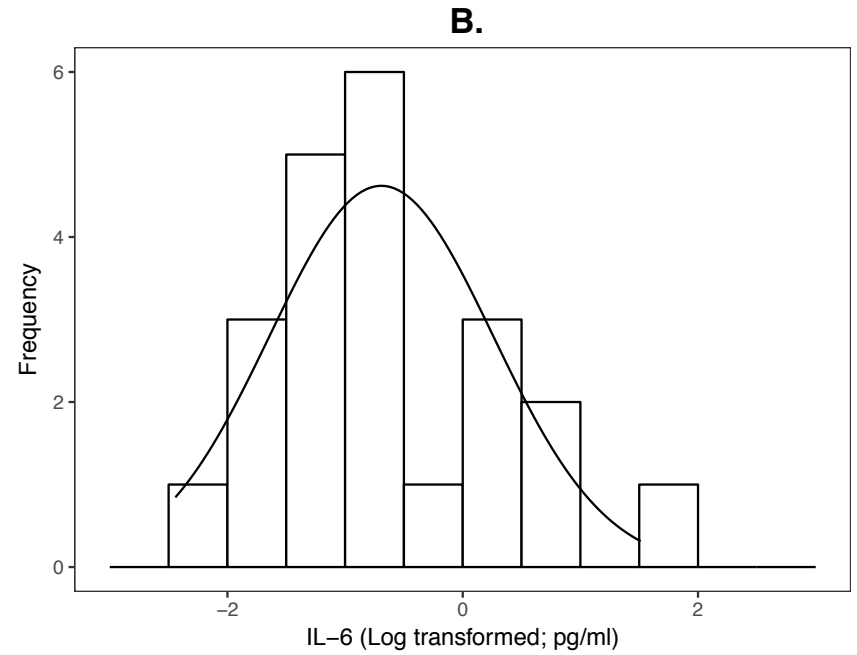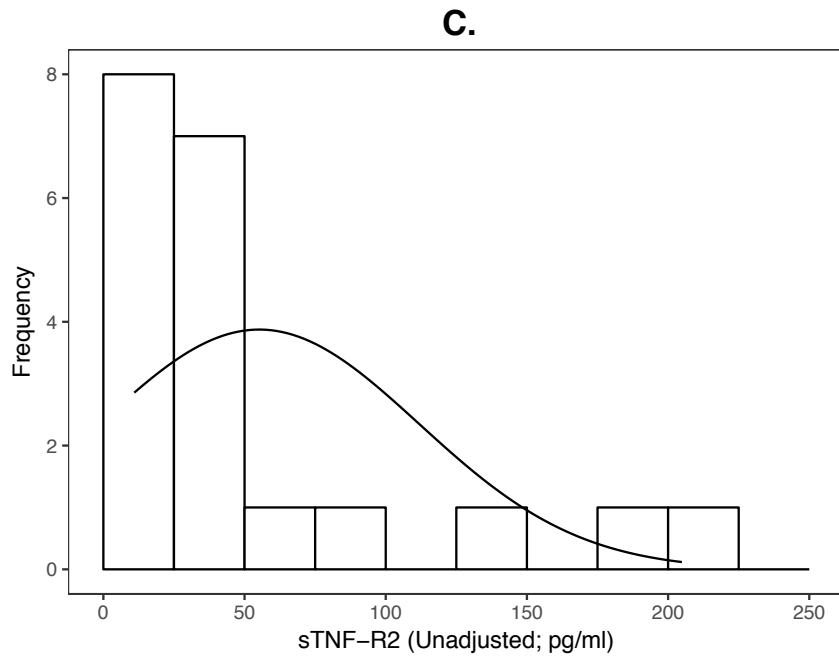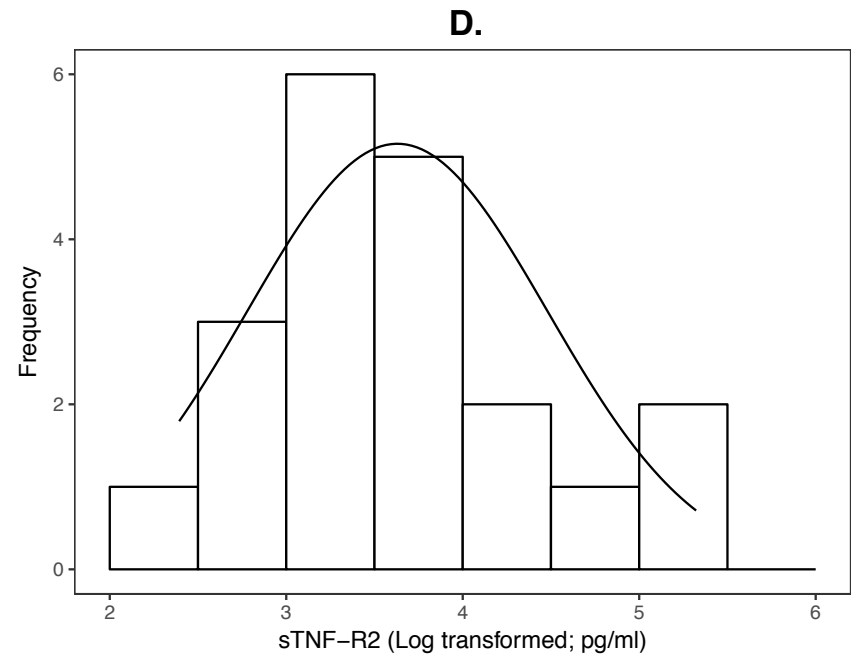

Supplement: NIHMS904803-supplement-FINAL_PRODUCTION_FILE__SDC_1.pdf [file NIHMS904803-supplement-FINAL_PRODUCTION_FILE__SDC_1.pdf]
